# Supplementary material for: Gut microbiome analysis in neuromyelitis optica reveals overabundance of Clostridium perfringens
Source: PubMed Central journal article supplement — Ann Neurol. 2016 Aug 4;80(3):443–7. doi: 10.1002/ana.24718 (PMC5053302; doi:10.1002/ana.24718), 2016-08-04
Supplement: ANA-80-443-s001.pdf [file ANA-80-443-s001.pdf]

**Supplementary Table 1. Subject Characteristics**

|                                    | <b>NMO</b>  | <b>MS</b>  | <b>HC</b> |
|------------------------------------|-------------|------------|-----------|
| Age - years (SD)                   | 47.9 (13.9) | 54 (11.5)  | 53 (15.9) |
| Disease duration - years (SD)      | 3.7 (3.2)   | 15.3 (8.6) | –         |
| <b>Gender - number (%)</b>         |             |            |           |
| Women                              | 12 (75.0)   | 8 (50.0)   | 7 (43.8)  |
| Men                                | 4 (25.0)    | 8 (50.0)   | 9 (56.2)  |
| <b>Demographics - number (%)</b>   |             |            |           |
| White / Caucasian                  | 3 (18.8)    | 13 (81.3)  | 11 (68.8) |
| Black / African-American           | 3 (18.8)    | 0 (0)      | 2 (12.5)  |
| Asian / Pacific Islander           | 5 (31.3)    | 1 (6.3)    | 2 (12.5)  |
| Other / Not Reported               | 5 (31.3)    | 2 (12.5)   | 1 (6.3)   |
| <b>Disease Course - number (%)</b> |             |            |           |
| <i>NMO</i>                         |             |            |           |
| Monophasic                         | 0 (0)       | –          | –         |
| Polyphasic                         | 16 (100)    | –          | –         |
| <i>MS</i>                          |             |            |           |
| RRMS                               | –           | 9 (56.3)   | –         |
| SPMS                               | –           | 4 (25.0)   | –         |
| PPMS                               | –           | 3 (18.8)   | –         |

RRMS=relapsing MS, SPMS=secondary progressive MS, PPMS=primary progressive MS. Of the NMO subjects, 8 were actively treated with rituximab, 6 with mycophenolate mofetil, and 1 with azathioprine. Of the MS subjects, 5 were actively treated with rituximab and 1 subject had remote prior exposure to rituximab with B cell reconstitution at the time of sample acquisition.

**Supplementary Table 2. Comparison of Age, Weight, Height, BMI and Nutritional Intake Between NMO, MS and HC.**

|                                         | NMO     |         | MS      |         | HC      |         | Prob > F |
|-----------------------------------------|---------|---------|---------|---------|---------|---------|----------|
|                                         | Mean    | SD      | Mean    | SD      | Mean    | SD      |          |
| <b>Age (years)</b>                      | 48.13   | 14.44   | 54.27   | 11.82   | 54.13   | 15.77   | 0.404    |
| <b>Weight (pounds)</b>                  | 157.33  | 32.81   | 152.60  | 17.96   | 155.73  | 29.01   | 0.377    |
| <b>Height (inches)</b>                  | 65.40   | 3.89    | 68.27   | 4.54    | 67.73   | 4.89    | nd       |
| <b>Body Mass Index (BMI)</b>            | 26.04   | 6.28    | 23.25   | 3.59    | 23.83   | 4.10    | 0.234    |
| <b>Food energy (kcal)</b>               | 1277.76 | 770.01  | 1477.91 | 769.96  | 1439.73 | 876.90  | 0.772    |
| <b>Protein (g)</b>                      | 51.86   | 39.56   | 56.93   | 30.02   | 57.24   | 35.35   | 0.896    |
| <b>Fat (g)</b>                          | 54.21   | 28.42   | 57.98   | 23.93   | 60.06   | 34.37   | 0.858    |
| <b>Carbohydrate (g)</b>                 | 142.93  | 98.10   | 180.86  | 122.22  | 157.69  | 111.00  | 0.643    |
| <b>Calcium (mg)</b>                     | 593.41  | 374.20  | 628.81  | 311.82  | 699.01  | 456.00  | 0.748    |
| <b>Phosphorus (mg)</b>                  | 875.89  | 620.63  | 990.97  | 528.91  | 997.54  | 612.37  | 0.818    |
| <b>Iron (mg)</b>                        | 9.24    | 7.26    | 13.18   | 8.58    | 12.51   | 8.26    | 0.365    |
| <b>Sodium (mg)</b>                      | 2066.69 | 1295.37 | 2590.91 | 1482.46 | 2440.54 | 1532.65 | 0.594    |
| <b>Potassium (mg)</b>                   | 1836.98 | 1307.26 | 2769.56 | 1529.76 | 2188.23 | 1147.57 | 0.168    |
| <b>Glutathione, total (mg)</b>          | 27.40   | 22.96   | 39.21   | 18.18   | 32.57   | 18.01   | 0.275    |
| <b>Glutathione, reduced (mg)</b>        | 18.26   | 16.25   | 24.77   | 11.59   | 21.83   | 12.88   | 0.435    |
| <b>Thiamine (Vitamin B1)(mg)</b>        | 1.11    | 1.11    | 1.42    | 1.05    | 1.32    | 1.04    | 0.719    |
| <b>Riboflavin (Vitamin B2)(mg)</b>      | 1.42    | 1.07    | 1.74    | 0.96    | 1.86    | 1.23    | 0.536    |
| <b>Niacin (mg)</b>                      | 15.73   | 17.16   | 18.00   | 10.64   | 18.82   | 15.56   | 0.838    |
| <b>Vitamin C (mg)</b>                   | 90.55   | 89.50   | 144.09  | 89.42   | 94.41   | 66.83   | 0.154    |
| <b>Saturated fat (g)</b>                | 16.16   | 8.13    | 15.39   | 6.97    | 19.02   | 12.54   | 0.549    |
| <b>Monounsaturated fatty acids (g)</b>  | 22.08   | 11.94   | 22.68   | 8.24    | 23.23   | 12.04   | 0.959    |
| <b>Polyunsaturated fatty acids (g)</b>  | 12.14   | 7.16    | 15.33   | 7.78    | 13.25   | 7.92    | 0.512    |
| <b>Cholesterol (mg)</b>                 | 172.81  | 96.09   | 155.60  | 81.35   | 193.96  | 107.08  | 0.549    |
| <b>Dietary fiber (g)</b>                | 12.69   | 13.06   | 21.97   | 18.42   | 14.50   | 8.63    | 0.168    |
| <b>Dietary soluble fiber (g)</b>        | 3.97    | 3.81    | 6.67    | 6.04    | 4.61    | 3.14    | 0.240    |
| <b>Food folate (mcg)</b>                | 232.62  | 247.41  | 375.84  | 224.22  | 266.63  | 141.85  | 0.160    |
| <b>Alpha-tocopherol (Vitamin E)(mg)</b> | 6.40    | 4.56    | 8.81    | 3.55    | 7.27    | 4.45    | 0.294    |
| <b>Zinc, total (mg)</b>                 | 7.07    | 4.98    | 8.84    | 4.50    | 9.68    | 6.08    | 0.387    |
| <b>Zinc, animal sources only (mg)</b>   | 3.29    | 1.91    | 3.17    | 1.80    | 4.40    | 2.33    | 0.195    |
| <b>Vitamin B6 (mg)</b>                  | 1.46    | 1.80    | 1.81    | 1.04    | 1.68    | 1.39    | 0.792    |
| <b>Magnesium (mg)</b>                   | 251.02  | 251.95  | 331.96  | 200.04  | 268.60  | 160.74  | 0.537    |
| <b>Vitamin A, RAE (mcg)</b>             | 716.68  | 612.13  | 1060.01 | 616.84  | 694.18  | 372.07  | 0.133    |
| <b>Retinol (mcg)</b>                    | 386.86  | 359.49  | 302.86  | 189.98  | 286.56  | 154.48  | 0.508    |
| <b>Alpha-carotene (mcg)</b>             | 284.86  | 232.46  | 942.88  | 856.77  | 457.90  | 429.55  | 0.008    |
| <b>Beta-carotene (mcg)</b>              | 3779.69 | 4153.71 | 8645.11 | 5544.01 | 4661.54 | 2810.62 | 0.008    |

| (continued)                                           | NMO     |         | MS      |         | HC      |         | Prob > F |
|-------------------------------------------------------|---------|---------|---------|---------|---------|---------|----------|
|                                                       | Mean    | SD      | Mean    | SD      | Mean    | SD      |          |
| <b>Cryptoxanthin (mcg)</b>                            | 116.24  | 140.61  | 205.49  | 167.74  | 112.15  | 100.85  | 0.129    |
| <b>Lutein-Zeaxanthin (mcg)</b>                        | 2791.78 | 2972.67 | 8008.93 | 5984.31 | 4220.07 | 2649.45 | 0.004    |
| <b>Lycopene (mcg)</b>                                 | 2679.46 | 2102.53 | 4764.37 | 4696.59 | 4470.66 | 4237.80 | 0.286    |
| <b>Folic acid (mcg)</b>                               | 97.42   | 80.05   | 123.17  | 126.16  | 158.30  | 183.68  | 0.479    |
| <b>Vitamin B12 (mcg)</b>                              | 4.26    | 4.00    | 3.63    | 2.63    | 4.41    | 3.39    | 0.803    |
| <b>Vitamin D (IU)</b>                                 | 119.53  | 122.72  | 104.03  | 99.04   | 84.03   | 58.41   | 0.608    |
| <b>Phylloquinone (Vitamin K<sub>1</sub>) (mcg)</b>    | 158.80  | 157.07  | 427.28  | 307.52  | 245.53  | 148.36  | 0.005    |
| <b>Copper (mg)</b>                                    | 1.18    | 1.20    | 1.51    | 1.00    | 1.19    | 0.74    | 0.594    |
| <b>Selenium (mcg)</b>                                 | 64.86   | 44.47   | 73.65   | 35.79   | 77.73   | 43.61   | 0.688    |
| <b>Sugars, total (g)</b>                              | 64.29   | 46.87   | 77.48   | 42.86   | 65.37   | 42.07   | 0.663    |
| <b>Trans fats, total (g)</b>                          | 1.45    | 0.94    | 1.15    | 0.69    | 1.58    | 1.11    | 0.431    |
| <b>Isoflavones, total (mg)</b>                        | 4.09    | 10.75   | 7.06    | 22.23   | 2.84    | 3.21    | 0.713    |
| <b>Quercetin (mg)</b>                                 | 6.59    | 5.50    | 7.64    | 5.01    | 6.12    | 7.84    | 0.793    |
| <b>Cysteine, S-containing (mg)</b>                    | 0.64    | 0.45    | 0.70    | 0.38    | 0.74    | 0.44    | 0.834    |
| <b>Methionine, S-containing (mg)</b>                  | 1.00    | 0.58    | 1.08    | 0.50    | 1.12    | 0.63    | 0.853    |
| <b>Cystine, S-containing (mg)</b>                     | 0.61    | 0.40    | 0.68    | 0.40    | 0.62    | 0.35    | 0.886    |
| <b>Average daily dietary folate equivalents (mcg)</b> | 398.23  | 364.85  | 585.23  | 366.64  | 535.75  | 420.19  | 0.394    |
| <b>Glycemic index (glucose), average daily</b>        | 48.83   | 2.86    | 46.03   | 4.28    | 48.64   | 4.37    | 0.101    |
| <b>Glycemic load (glucose), average daily</b>         | 63.45   | 41.56   | 72.34   | 45.31   | 70.73   | 54.65   | 0.862    |
| <b>Dietary arginine (mg)</b>                          | 2382.49 | 1617.03 | 3056.05 | 1704.93 | 2703.32 | 1443.06 | 0.516    |
| <b>Dietary PUFA (~N-6) 18:2, (g)</b>                  | 9.49    | 5.51    | 12.21   | 6.20    | 10.76   | 6.46    | 0.478    |
| <b>Dietary PUFA (~N-3) 18:3, (g)</b>                  | 1.06    | 0.64    | 1.36    | 0.77    | 1.17    | 0.85    | 0.533    |
| <b>Dietary PUFA (~N-4) 18:4, (g)</b>                  | 0.00    | 0.01    | 0.00    | 0.00    | 0.00    | 0.00    | 0.769    |
| <b>Dietary PUFA (~N-6) 20:4, (g)</b>                  | 0.07    | 0.05    | 0.07    | 0.04    | 0.08    | 0.05    | 0.792    |
| <b>Dietary N-3 PUFA 20:5 (EPA)(g)</b>                 | 0.04    | 0.07    | 0.03    | 0.03    | 0.02    | 0.02    | 0.787    |
| <b>Dietary N-3 PUFA 22:5 (DPA)(g)</b>                 | 0.01    | 0.02    | 0.01    | 0.01    | 0.01    | 0.01    | 0.832    |
| <b>Dietary N-3 PUFA 22:6 (DHA)(g)</b>                 | 0.05    | 0.08    | 0.04    | 0.04    | 0.05    | 0.03    | 0.915    |
| <b>Average daily omega-6 FA (g)</b>                   | 9.57    | 5.55    | 12.28   | 6.21    | 10.85   | 6.48    | 0.482    |
| <b>Average daily omega-3 FA (g)</b>                   | 1.16    | 0.74    | 1.45    | 0.79    | 1.25    | 0.89    | 0.597    |
| <b>Fructose (g)</b>                                   | 17.76   | 17.75   | 23.49   | 20.31   | 15.62   | 8.66    | 0.404    |
| <b>Lactose (g)</b>                                    | 6.74    | 6.86    | 4.31    | 3.37    | 5.99    | 5.79    | 0.474    |
| <b>Maltose (g)</b>                                    | 1.76    | 1.79    | 1.85    | 1.51    | 1.90    | 1.83    | 0.973    |
| <b>Galactose (g)</b>                                  | 0.12    | 0.10    | 0.18    | 0.12    | 0.17    | 0.13    | 0.374    |
| <b>Sucrose (g)</b>                                    | 17.18   | 15.71   | 20.25   | 8.53    | 20.11   | 19.10   | 0.822    |
| <b>Glucose (g)</b>                                    | 16.95   | 17.23   | 18.13   | 12.96   | 14.75   | 8.10    | 0.781    |
| <b>Total choline (mg)</b>                             | 214.46  | 125.36  | 260.70  | 129.90  | 249.24  | 123.60  | 0.584    |
| <b>Free choline (mg)</b>                              | 55.53   | 38.55   | 83.59   | 59.04   | 69.07   | 36.44   | 0.256    |
| <b>Phosphocholine (mg)</b>                            | 8.27    | 4.97    | 15.57   | 12.43   | 9.85    | 5.77    | 0.054    |

| (continued)                            | NMO    |        | MS     |        | HC     |        | Prob > F |
|----------------------------------------|--------|--------|--------|--------|--------|--------|----------|
|                                        | Mean   | SD     | Mean   | SD     | Mean   | SD     |          |
| <b>Glycerophosphocholine (GPC)(mg)</b> | 30.27  | 17.44  | 31.77  | 14.10  | 34.94  | 19.58  | 0.751    |
| <b>Phosphatidylcholine (PTD)(mg)</b>   | 108.61 | 64.89  | 119.38 | 54.57  | 121.23 | 65.97  | 0.835    |
| <b>Betaine (mg)</b>                    | 115.75 | 106.13 | 216.81 | 141.98 | 146.50 | 103.60 | 0.068    |
| <b>Sphingomyelin (SM)(mg)</b>          | 11.23  | 6.82   | 10.03  | 5.65   | 13.28  | 9.34   | 0.485    |

Study subjects completed a dietary questionnaire (Block Dietary Data Systems, nutritionquest.com). The following diet variables were derived from the questionnaire: 'Food energy, kcals', 'Protein, gms', 'Fat, gms', 'Carbohydrate, gms', 'Calcium, mg', 'Phosphorous, mg', 'Iron, mg', 'Sodium, mg', 'Potassium, mg', 'Glutathione, total, mg', 'Glutathione, reduced, mg', 'Thiamine (Vitamin B1), mg', 'Riboflavin (Vitamin B2), mg', 'Niacin, mg', 'Vitamin C, mg', 'Saturated fat, gms', 'Monounsaturated fatty acids, gms', 'Cholesterol, mg', 'Dietary fiber, gms', 'Dietary soluble fiber, gms', 'Food folate mcg', 'alpha-tocopherol (Vitamin E), mg', 'Zinc, total mg', 'Zinc, animal sources only, mg', 'Vitamin B6, mg', 'Magnesium, mg', 'Vitamin A, RAE (mcg)', 'Retinol, mcg', 'Alpha-carotene, mcg', 'Beta-carotene, mcg', 'Cryptoxanthin, mcg', 'Lutein-Zeaxanthin, mcg', 'Lycopene, mcg', 'Folic-acid, mcg', 'Vitamin D, IU', 'Phylloquinone (Vitamin K), mcg', 'Copper, mg', 'Selenium, mcg', 'Sugars, total, gms', 'Trans fats, total, gms', 'Isoflavones, total, mg', 'Quercetin, mg', 'Cysteine (S-containing), mg', 'Methionine (S-containing), mg', 'Cystine (S-containing), mg', 'Average daily dietary folate equivalents, mcg', 'Glycemic index (glucose), average daily', 'Glycemic load (glucose), average daily', 'Dietary arginine, mg', 'Dietary PUFA (~N6) 18:2, gms', 'Dietary PUFA (~N3) 18:3, gms', 'Dietary PUFA (~N3) 18:4, gms', 'Dietary PUFA (~N6) 20:4, gms', 'Dietary N-3 PUFA 20:5 (EPA), gms', 'Dietary N-3 PUFA 22:5 (DPA), gms', 'Dietary N-3 PUFA 20:6 (DPA), gms', 'Average daily omega-6 fatty acids, gms', 'Average daily omega-3 fatty acids, gms', 'Fructose, gms', 'Lactose, gms', 'Maltose, gms', 'Galactose, gms', 'Sucrose, gms', 'Glucose, gms', 'Total choline, mg', 'Free choline, mg', 'Phosphocholine, mg', 'Glycerophosphocholine (GCP), mg', 'Phosphatidylcholine (PTD), mg', 'Betaine, mg', 'Sphingomyelin, mg'. ANOVA was used to compare the mean values of each of these dietary factors across the three groups (HC, NMO and MS). In addition to the listed dietary variables, age, weight and BMI were also compared across the 3 groups. Differences were considered significant if the F-test yielded a p-value of <0.05. The following dietary variables differed between the groups: alpha-carotene, beta-carotene, lutein-zeaxanthin, and phylloquinone (vitamin K<sub>1</sub>). There were no other significant differences observed between these groups for other any other dietary factor or for the variables: age, weight and BMI.

Comparison of daily nutritional intake between HC, NMO and MS. ANOVA was used to compare the means of each nutrient between the three groups and post-hoc tests (Sidak, Bonferroni or Scheffe) were used to assess pair-wise comparisons for nutrients with F-test *p*-values < 0.05. *P*-values for nutrients that significantly differed in at least one group are highlighted in grey. No adjustments to the *p*-values for multiple hypotheses were made. For alpha-carotene, MS differed from both HC and NMO whereas NMO did not differ from HC. For beta-carotene MS differed from both HC and NMO whereas NMO did not differ from HC. For lutein-zeaxanthin, MS differed from both HC and NMO whereas NMO did not differ from HC. For phylloquinone (vitamin K<sub>1</sub>) MS differed from NMO whereas NMO did not differ from HC and MS did not differ from HC.

**Supplementary Table 3. OTUs that differentiate NMO from HC<sup>a</sup>**

| Phylum                | Class                      | Order                    | Family                    | Genus                 | Species               | Relative abundance in NMO | p-value                 |
|-----------------------|----------------------------|--------------------------|---------------------------|-----------------------|-----------------------|---------------------------|-------------------------|
| <i>Fibrobacteres</i>  | unclassified               | unclassified             | unclassified              | unclassified          | unclassified          | 1.20                      | 2.63 x 10 <sup>-8</sup> |
| <i>Firmicutes</i>     | <i>Clostridia</i>          | <i>Clostridiales</i>     | <i>Clostridiaceae</i>     | <i>Clostridium</i>    | <i>perfringens</i>    | 1.12                      | 5.24 x 10 <sup>-8</sup> |
| <i>Tenericutes</i>    | <i>Mollicutes</i>          | <i>Acholeplasmatales</i> | <i>Acholeplasmataceae</i> | <i>Acholeplasma</i>   | unclassified          | 1.17                      | 9.21 x 10 <sup>-8</sup> |
| <i>Firmicutes</i>     | <i>Clostridia</i>          | <i>Clostridiales</i>     | unclassified              | unclassified          | unclassified          | 1.13                      | 2.21 x 10 <sup>-7</sup> |
| <i>Firmicutes</i>     | <i>Clostridia</i>          | <i>Clostridiales</i>     | <i>Lachnospiraceae</i>    | <i>Coproccoccus</i>   | unclassified          | 1.34                      | 2.24 x 10 <sup>-7</sup> |
| <i>Bacteroidetes</i>  | <i>Bacteroidia</i>         | <i>Bacteroidales</i>     | unclassified              | unclassified          | unclassified          | 1.14                      | 2.68 x 10 <sup>-7</sup> |
| <i>Firmicutes</i>     | <i>Clostridia</i>          | <i>Clostridiales</i>     | <i>Lachnospiraceae</i>    | <i>Blautia</i>        | <i>producta</i>       | 1.25                      | 3.95 x 10 <sup>-7</sup> |
| <i>Bacteroidetes</i>  | <i>Bacteroidia</i>         | <i>Bacteroidales</i>     | <i>Prevotellaceae</i>     | <i>Prevotella</i>     | 97otu18529            | 0.26                      | 4.71 x 10 <sup>-7</sup> |
| <i>Firmicutes</i>     | <i>Clostridia</i>          | <i>Clostridiales</i>     | unclassified              | unclassified          | unclassified          | 1.06                      | 6.31 x 10 <sup>-7</sup> |
| <i>Proteobacteria</i> | <i>Alphaproteobacteria</i> | unclassified             | unclassified              | unclassified          | unclassified          | 1.36                      | 6.75 x 10 <sup>-7</sup> |
| <i>Firmicutes</i>     | <i>Clostridia</i>          | <i>Clostridiales</i>     | <i>Lachnospiraceae</i>    | unclassified          | unclassified          | 1.53                      | 7.33 x 10 <sup>-7</sup> |
| <i>Elusimicrobia</i>  | <i>Elusimicrobia</i>       | FAC88                    | 91otu12128                | 94otu9638             | 97otu81717            | 1.26                      | 7.61 x 10 <sup>-7</sup> |
| <i>Bacteroidetes</i>  | <i>Bacteroidia</i>         | <i>Bacteroidales</i>     | <i>Porphyromonadaceae</i> | unclassified          | unclassified          | 1.22                      | 1.34 x 10 <sup>-6</sup> |
| <i>Proteobacteria</i> | <i>Gammaproteobacteria</i> | unclassified             | unclassified              | unclassified          | unclassified          | 1.38                      | 1.44 x 10 <sup>-6</sup> |
| <i>Bacteroidetes</i>  | <i>Bacteroidia</i>         | <i>Bacteroidales</i>     | <i>Bacteroidaceae</i>     | <i>Bacteroides</i>    | unclassified          | 1.40                      | 1.45 x 10 <sup>-6</sup> |
| <i>Bacteroidetes</i>  | <i>Bacteroidia</i>         | <i>Bacteroidales</i>     | <i>Prevotellaceae</i>     | <i>Prevotella</i>     | <i>melaninogenica</i> | 1.27                      | 1.52 x 10 <sup>-6</sup> |
| <i>Firmicutes</i>     | <i>Clostridia</i>          | <i>Clostridiales</i>     | <i>Ruminococcaceae</i>    | unclassified          | unclassified          | 1.26                      | 2.16 x 10 <sup>-6</sup> |
| <i>Bacteroidetes</i>  | <i>Flavobacteriia</i>      | <i>Flavobacteriales</i>  | <i>Flavobacteriaceae</i>  | <i>Flavobacterium</i> | 97otu13948            | 1.05                      | 2.19 x 10 <sup>-6</sup> |
| <i>Firmicutes</i>     | <i>Clostridia</i>          | <i>Clostridiales</i>     | <i>Lachnospiraceae</i>    | <i>Coproccoccus</i>   | unclassified          | 1.24                      | 2.53 x 10 <sup>-6</sup> |
| KSB3                  | 79otu904                   | 85otu2233                | 91otu6419                 | 94otu17237            | 97otu28635            | 1.43                      | 2.68 x 10 <sup>-6</sup> |
| <i>Proteobacteria</i> | <i>Gammaproteobacteria</i> | <i>Chromatiales</i>      | <i>Chromatiaceae</i>      | 94otu11281            | 97otu50557            | 1.27                      | 2.76 x 10 <sup>-6</sup> |
| <i>Proteobacteria</i> | <i>Gammaproteobacteria</i> | <i>Legionellales</i>     | <i>Coxiellaceae</i>       | 94otu3394             | 97otu55659            | 0.15                      | 3.96 x 10 <sup>-6</sup> |
| <i>Bacteroidetes</i>  | <i>Bacteroidia</i>         | <i>Bacteroidales</i>     | <i>Prevotellaceae</i>     | <i>Prevotella</i>     | 97otu35422            | 0.32                      | 4.35 x 10 <sup>-6</sup> |

(continued)

| Phylum                  | Class                      | Order                         | Family                         | Genus                         | Species               | Relative abundance in NMO | p-value                 |
|-------------------------|----------------------------|-------------------------------|--------------------------------|-------------------------------|-----------------------|---------------------------|-------------------------|
| <i>Bacteroidetes</i>    | <i>Bacteroidia</i>         | <i>Bacteroidales</i>          | <i>Prevotellaceae</i>          | <i>Prevotella</i>             | <i>copri</i>          | 0.11                      | 4.64 x 10 <sup>-6</sup> |
| <i>Gemmatimonadetes</i> | <i>Gemm-1</i>              | 85otu2854                     | 91otu10683                     | 94otu20578                    | 97otu45170            | 1.27                      | 5.86 x 10 <sup>-6</sup> |
| <i>Verrucomicrobia</i>  | [ <i>Spartobacteria</i> ]  | [ <i>Chthoniobacterales</i> ] | [ <i>Chthoniobacteraceae</i> ] | DA101                         | 97otu17249            | 0.18                      | 6.09 x 10 <sup>-6</sup> |
| <i>Proteobacteria</i>   | <i>Gammaproteobacteria</i> | <i>Enterobacteriales</i>      | <i>Enterobacteriaceae</i>      | unclassified                  | unclassified          | 4.08                      | 6.30 x 10 <sup>-6</sup> |
| <i>Firmicutes</i>       | <i>Clostridia</i>          | <i>Clostridiales</i>          | 91otu15265                     | 94otu30131                    | 97otu33231            | 0.14                      | 8.27 x 10 <sup>-6</sup> |
| <i>Firmicutes</i>       | <i>Clostridia</i>          | <i>Clostridiales</i>          | <i>Lachnospiraceae</i>         | <i>Blautia</i>                | 97otu10785            | 1.34                      | 8.81 x 10 <sup>-6</sup> |
| <i>Firmicutes</i>       | <i>Clostridia</i>          | <i>Clostridiales</i>          | unclassified                   | unclassified                  | unclassified          | 0.92                      | 9.79 x 10 <sup>-6</sup> |
| <i>Actinobacteria</i>   | <i>Actinobacteria</i>      | <i>Actinomycetales</i>        | <i>Corynebacteriaceae</i>      | <i>Corynebacterium</i>        | unclassified          | 1.26                      | 1.01 x 10 <sup>-5</sup> |
| <i>Firmicutes</i>       | <i>Clostridia</i>          | <i>Clostridiales</i>          | <i>Ruminococcaceae</i>         | <i>Ruminococcus</i>           | unclassified          | 1.19                      | 1.03 x 10 <sup>-5</sup> |
| <i>Bacteroidetes</i>    | <i>Bacteroidia</i>         | <i>Bacteroidales</i>          | <i>Prevotellaceae</i>          | <i>Prevotella</i>             | <i>melaninogenica</i> | 1.15                      | 1.07 x 10 <sup>-5</sup> |
| <i>Spirochaetes</i>     | <i>Spirochaetes</i>        | <i>Spirochaetales</i>         | <i>Spirochaetaceae</i>         | <i>Treponema</i>              | <i>socranskii</i>     | 1.19                      | 1.13 x 10 <sup>-5</sup> |
| <i>Acidobacteria</i>    | <i>Acidobacteria-6</i>     | iii1-15                       | 91otu412                       | 94otu11629                    | 97otu29451            | 1.37                      | 1.23 x 10 <sup>-5</sup> |
| <i>Firmicutes</i>       | <i>Clostridia</i>          | <i>Clostridiales</i>          | unclassified                   | unclassified                  | unclassified          | 1.20                      | 1.30 x 10 <sup>-5</sup> |
| KSB3                    | unclassified               | unclassified                  | unclassified                   | unclassified                  | unclassified          | 1.23                      | 1.30 x 10 <sup>-5</sup> |
| <i>Planctomycetes</i>   | <i>Phycisphaerae</i>       | unclassified                  | unclassified                   | unclassified                  | unclassified          | 1.21                      | 1.31 x 10 <sup>-5</sup> |
| <i>Proteobacteria</i>   | <i>Gammaproteobacteria</i> | unclassified                  | unclassified                   | unclassified                  | unclassified          | 2.05                      | 1.50 x 10 <sup>-5</sup> |
| <i>Proteobacteria</i>   | <i>Gammaproteobacteria</i> | <i>Enterobacteriales</i>      | <i>Enterobacteriaceae</i>      | unclassified                  | unclassified          | 1.87                      | 1.56 x 10 <sup>-5</sup> |
| <i>Tenericutes</i>      | <i>Mollicutes</i>          | unclassified                  | unclassified                   | unclassified                  | unclassified          | 1.28                      | 1.69 x 10 <sup>-5</sup> |
| <i>Tenericutes</i>      | <i>Mollicutes</i>          | <i>Acholeplasmatales</i>      | <i>Acholeplasmataceae</i>      | <i>Candidatus Phytoplasma</i> | unclassified          | 0.99                      | 1.82 x 10 <sup>-5</sup> |

<sup>a</sup>OTUs that significantly differed in abundance between NMO and HC after adjusting for multiple comparisons ( $p < 1.91 \times 10^{-5}$ ), ranked in order of decreasing statistical significance. The relative abundance is the average HybScore in NMO divided by the average HybScore of HC. Thus, values that are >1 are more abundant in NMO and values that are <1 are more abundant in HC. Although *C. perfringens* was the single specific bacterial species with the most significant association with NMO, an unclassified species of *Fibrobacteres* had a more significant *p*-value whereas other species with less significant associations, e.g., *Prevotella copri* or *Enterobacteriaceae* of an unknown species, had greater effect sizes.
